# Supplementary material
Source: Springer Nature journal article supplement (https://www.springermedizin.de/resource/supplementary/12984_2008_161_MOESM1_ESM.pdf/9605448)
Supplement: MOESM1 [file 9605448]

**Additional file 1 - Overview of upper extremity rehabilitation robotics for stroke patients that have been tested through one or more clinical trials**

(FB= feedback, DF= Degrees of freedom, PA= Physiotherapy Approach, A= Analytical, T= Task-oriented, TDL= therapist dependency level: 0=no, 1=minimal 2=fully dependent, OCM= outcome measure, CT= clinical trial, CCT= controlled clinical trial, RCT= randomized controlled clinical trial, AS=Ashworth Scale, FM=Fugl Meyer Assessment, FIM= Functional Independence Measure, MRC=Medical Research Council motor power score, MSS=Motor Status Scale, MP=Motor Power Scale, AMAT=Arm Motor Ability Test, WMFT=Wolf Motor Function Test, SIS=Stroke Impact Scale, RMA= Rivermead Motor Assessment, TCT= Trunk Control Test, RFT= Rancho Functional Test, CMM= Chedoke-McMaster test, EMG= electromyography, BBT = Box and Blocks test, mBBT= modified Box and Blocks test, JT= Jebson Test, UMAQS= University of Maryland Arm Questionnaire, KM= kinematic information).

| Name<br>(total amount<br>of patients<br>tested) | Body<br>area<br>trained              | Modalities                                                      | DF | P-<br>A | FB                                           | TDL | CT<br>CCT<br>RCT<br>(n patients) | OCM                       | Acute<br>subacute<br>chronic<br>patients |
|-------------------------------------------------|--------------------------------------|-----------------------------------------------------------------|----|---------|----------------------------------------------|-----|----------------------------------|---------------------------|------------------------------------------|
| <b>MIT-Manus<br/>(372)</b>                      | shoulder<br>elbow<br>wrist<br>(hand) | passive<br>active<br>interactive: movement-<br>or emg-triggered | 2  | A       | Concurrent:<br>visual<br>tactile<br>auditory | 2   | CT (30) [135]                    | FM,FIM,<br>MP,MSS         | chronic                                  |
|                                                 |                                      |                                                                 |    |         |                                              |     | CT (30) [136]                    | MSS,FM,<br>WMFT           | chronic                                  |
|                                                 |                                      |                                                                 |    |         |                                              |     | CT (15) [137]                    | FM,MP,<br>WMFT,<br>SIS,KM | chronic                                  |
|                                                 |                                      |                                                                 |    |         |                                              |     | CT(3) [131]                      | EMG                       | subacute                                 |
|                                                 |                                      |                                                                 |    |         |                                              |     | CT(117) [138]                    | FM, KM                    | chronic                                  |
|                                                 |                                      |                                                                 |    |         |                                              |     | RCT(20) [139]                    | FM,FIM                    | acute                                    |
|                                                 |                                      |                                                                 |    |         |                                              |     | RCT (56)[140]                    | FM,FIM<br>MSS, MPS        | acute                                    |
|                                                 |                                      |                                                                 |    |         |                                              |     | RCT(12)[141]                     | AMAT<br>FM, KM            | chronic                                  |
| <b>MIME<br/>(76)</b>                            | shoulder<br>elbow<br>forearm         | passive<br>active-assisted<br>active-constrained<br>bimanual    | 6  | A       | none                                         | 2   | CT (13) [147]                    | KM                        | chronic                                  |
|                                                 |                                      |                                                                 |    |         |                                              |     | RCT (21)[146]                    | FM                        | chronic                                  |
|                                                 |                                      |                                                                 |    |         |                                              |     | RCT (27)[145]                    | FM<br>FIM                 | chronic                                  |
|                                                 |                                      |                                                                 |    |         |                                              |     | RCT (15)[148]                    | FM<br>FIM                 | subacute                                 |
| <b>BI-MANU-<br/>TRACK<br/>(66)</b>              | forearm<br>wrist                     | bimanual: passive or<br>active                                  | 1  | A       | none                                         | 1   | CT (10) [149]                    | FM                        | subacute                                 |
|                                                 |                                      |                                                                 |    |         |                                              |     | CT(12) [126]                     | MAS,<br>RMA               | chronic                                  |
|                                                 |                                      |                                                                 |    |         |                                              |     | RCT(44)[127]                     | FM, AS<br>MRC             | subacute                                 |
| <b>BATRAC<br/>(37)</b>                          | shoulder<br>elbow                    | active<br>active assisted                                       | 1  | A       | none                                         | 1   | CT (16) [65]                     | FM,<br>WMFT<br>UMAQS      | chronic                                  |

|                                   |                                       |                                                                 |         |        |                                                                |     |               |                             |                                     |          |
|-----------------------------------|---------------------------------------|-----------------------------------------------------------------|---------|--------|----------------------------------------------------------------|-----|---------------|-----------------------------|-------------------------------------|----------|
|                                   |                                       |                                                                 |         |        |                                                                |     |               | RCT (21) [67]               | FM,<br>WMFT<br>UMAQS<br>fMRI<br>EMG | chronic  |
| <b>ARM-in<br/>(3)</b>             | shoulder<br>elbow<br>forearm<br>wrist | active<br>passive<br>interactive                                | 6       | T<br>A | position<br>force                                              | 2   | CT (3) [154]  | FM<br>KM                    |                                     | chronic  |
| <b>NeReBot<br/>(35)</b>           | shoulder<br>elbow                     | active<br>active assisted<br>passive                            | 3       | A      | visual<br>auditory<br>KP                                       | 2   | RCT (35)[156] | FM MRC<br>FIM<br>TCT<br>MAS |                                     | acute    |
| <b>AJB<br/>(6)</b>                | Elbow                                 | active<br>active assisted                                       | 1       | A      | -                                                              | 1   | CT (6) [157]  | FM<br>MAS                   |                                     | chronic  |
| <b>T-Wrex<br/>(9)</b>             | shoulder<br>elbow<br>forearm<br>wrist | passive<br>interactive:<br>active, active-assisted,<br>resisted | 2       | T<br>A | position<br>grip force<br>coordination<br>speed                | 1-2 | CT (9) [19]   | FM, BBT,<br>MBBT,<br>RFT    |                                     | chronic  |
| <b>UniTherapy<br/>(23)</b>        | shoulder<br>elbow<br>forearm          | passive<br>interactive:<br>active, active-assisted,<br>resisted | 2       | A      | terminal FB:<br>visual<br>auditory                             |     | CCT (16) [14] | FM,<br>KM,<br>EMG           |                                     | chronic  |
|                                   |                                       |                                                                 |         |        |                                                                |     | CT (7) [161]  | FM,<br>KM                   |                                     | chronic  |
| <b>Haptic<br/>Master<br/>(46)</b> | shoulder<br>elbow<br>forearm          | passive<br>interactive:<br>active; active-assisted,<br>resisted | 3<br>+3 | T<br>A | -                                                              | 2   | CT (31) [164] | FM, MAS                     |                                     | chronic  |
|                                   |                                       |                                                                 |         |        |                                                                |     | CT (15)[162]  | MRC,<br>KM                  |                                     | subacute |
| <b>ArmGuide<br/>(41)</b>          | shoulder                              | passive<br>active, active-assisted<br>,resisted                 | 4       | A      | concurrent:<br>visual                                          | 2   | CT (1) [167]  | KM                          |                                     | ?        |
|                                   |                                       |                                                                 |         |        |                                                                |     | CT (19) [168] | RFT,<br>CMM,<br>KM          |                                     | chronic  |
|                                   |                                       |                                                                 |         |        |                                                                |     | RCT (21)[169] | FM,<br>WMFT,<br>RLA         |                                     | chronic  |
| <b>RM II<br/>(7)</b>              | hand                                  | interactive:<br>active<br>active-resisted                       |         | A<br>T | terminal KR &<br>KP<br>concurrent:<br>force,auditory<br>visual | 0   | CT (4) [171]  | KM, JT                      |                                     | chronic  |
|                                   |                                       |                                                                 |         |        |                                                                |     | CT (3) [15]   | KM, JT                      |                                     | chronic  |
